# Supplementary material
Source: publisher site journal article supplement (https://www.dovepress.com/article/381102)
Supplement: Supplementary file 1 [file get_supplementary_file.php]

**Supplementary Table S1.** Optimized compound dependent LC-MS/MS parameters

| Analyte    | Q1Mass (Da) | Q3 Mass (Da) | Retention (min) | Relative Retention (Sec) | DP(V) | EP(V) | CE(V) | CXP(V) |
|------------|-------------|--------------|-----------------|--------------------------|-------|-------|-------|--------|
| Quercetin  | 301.3       | 151.2        | 4.993           | 100                      | 84    | 10    | 31    | 10     |
| Quercetin  | 301.3       | 179.2        |                 | 100                      | 84    | 10    | 27    | 10     |
| Probenecid | 283.910     | 240          |                 | 100                      | 70    | 10    | 22    | 3      |
